# Supplementary material for: Long read genome assemblers struggle with small plasmids
Source: PubMed Central journal article supplement (PMC10272865; doi:10.1099/mgen.0.001024), 2023-05-24
Supplement: mgen-9-1024-s001.pdf [file mgen-9-1024-s001.pdf]

Supplementary Table 1. Long and short read summary statistics and NCBI accession numbers for bacterial isolates used in this study.

| Strain        | Accession    | Genome Size<br>(bp) | Average                 | ONT Read           |                           | Predicted<br>Completeness |
|---------------|--------------|---------------------|-------------------------|--------------------|---------------------------|---------------------------|
|               |              |                     | ONT Read<br>Length (bp) | Subset<br>Coverage | Illumina Read<br>Coverage |                           |
| ATCC 14028    | SAMN32977646 | 4964086             | 6066                    | 64                 | 57                        | 100.0                     |
| ATCC 14458    | SAMN32977647 | 2922051             | 3521                    | 66                 | 42                        | 99.4                      |
| ATCC 23235    | SAMN32977648 | 2747791             | 3382                    | 73                 | 51                        | 99.5                      |
| ATCC 25922    | SAMN32977649 | 5209984             | 5236                    | 58                 | 82                        | 100.0                     |
| ATCC 25923    | SAMN32977650 | 2801053             | 4164                    | 68                 | 64                        | 99.5                      |
| ATCC 33090    | SAMN32977651 | 2887185             | 5569                    | 62                 | 70                        | 99.5                      |
| ATCC BAA-2146 | SAMN32977652 | 5781499             | 3450                    | 71                 | 107                       | 99.9                      |
| 2022NG-0032   | SAMN33482239 | 2171594             | 2823                    | 42                 | 146                       | 99.8                      |
| 2020QW-00078  | SAMN17608176 | 5563965             | 10815                   | 51                 | 83                        | 100.0                     |
| 2021QW-00045  | SAMN21919088 | 5466574             | 10028                   | 65                 | 64                        | 100.0                     |
| 2021QW-00056  | SAMN21919093 | 5285754             | 7145                    | 60                 | 67                        | 100.0                     |
| 2021QW-00057  | SAMN22066472 | 5215713             | 7872                    | 68                 | 72                        | 99.6                      |
| 2022NG-0076   | SAMN33482240 | 2172570             | 2566                    | 75                 | 139                       | 99.6                      |
| 2022QW-00133  | SAMN32885235 | 2851245             | 4242                    | 49                 | 104                       | 99.3                      |

Additional supplementary data and code can be found at

[https://github.com/johnsonj161/for\\_publications/tree/107c3dd3865cff8ab5bd86ef70249a65b465aa9c/Long%20read%20genome%20assemblers%20struggle%20with%20small%20plasmids](https://github.com/johnsonj161/for_publications/tree/107c3dd3865cff8ab5bd86ef70249a65b465aa9c/Long%20read%20genome%20assemblers%20struggle%20with%20small%20plasmids).
